# Supplementary material for: Kinase Hog1 and Adr1 Opposingly Regulate Haploid Cell Morphology by Controlling Vacuole Size in Sporisorium scitamineum
Source: MDPI journal article supplement (doi:10.3390/jof8080865), 2022-08-17
Supplement: s1 [file s1]

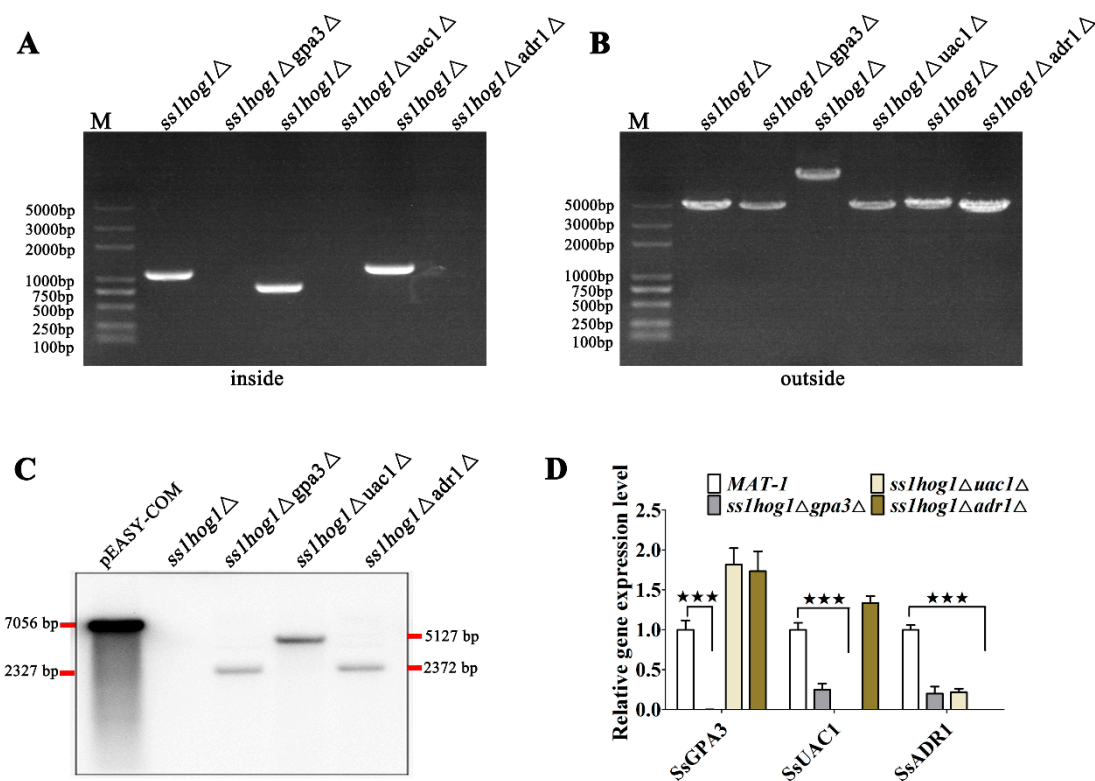

**Figure S1. Identification of mutants by PCR amplification, Southern blot, and RT-qPCR.** (A) and (B) PCR amplification was performed using specific primers inside-F/inside-F or outside-F/outside-F (listed in Table S1) to confirm the replacement of targeted gene with the *ZEO<sup>R</sup>* selection marker. Molecular markers in bp were labeled. (C) Southern blot analysis was performed for confirming the deletion mutants. The genomic DNA of *ss1hog1Δ*, *ss1hog1Δgpa3Δ*, *ss1hog1Δuac1Δ*, *ss1hog1Δadr1Δ*, and pEASY-COM plasmid were digested with the restriction enzyme *HindIII* at 37 °C for overnight. The *ZEO<sup>R</sup>* gene was used as the probe. The 7056 bp band of the pEASY-COM plasmid served as a positive control of the experimental procedure. Probed bands of 2327 bp, 5127 bp and 2372 bp size in the *ss1hog1Δgpa3Δ*, *ss1hog1Δuac1Δ*, and *ss1hog1Δadr1Δ* mutants confirmed the correct gene replacement events, severally. (D) RT-qPCR analysis for expression of *SsGPA3*, *SsUAC1*, and *SsADR1* genes in the wild type and mutants under sporidial growth on YePSA plate for 24 h, respectively. Relative gene expression level was calculated with  $-\Delta\Delta C_t$  method with *GAPDH* as internal control. Barchart depicts statistical difference among the mean values (\*\*\*p < 0.001). Mean  $\pm$  S.E. are derived from three independent biological repeats, each of which contained three replications.

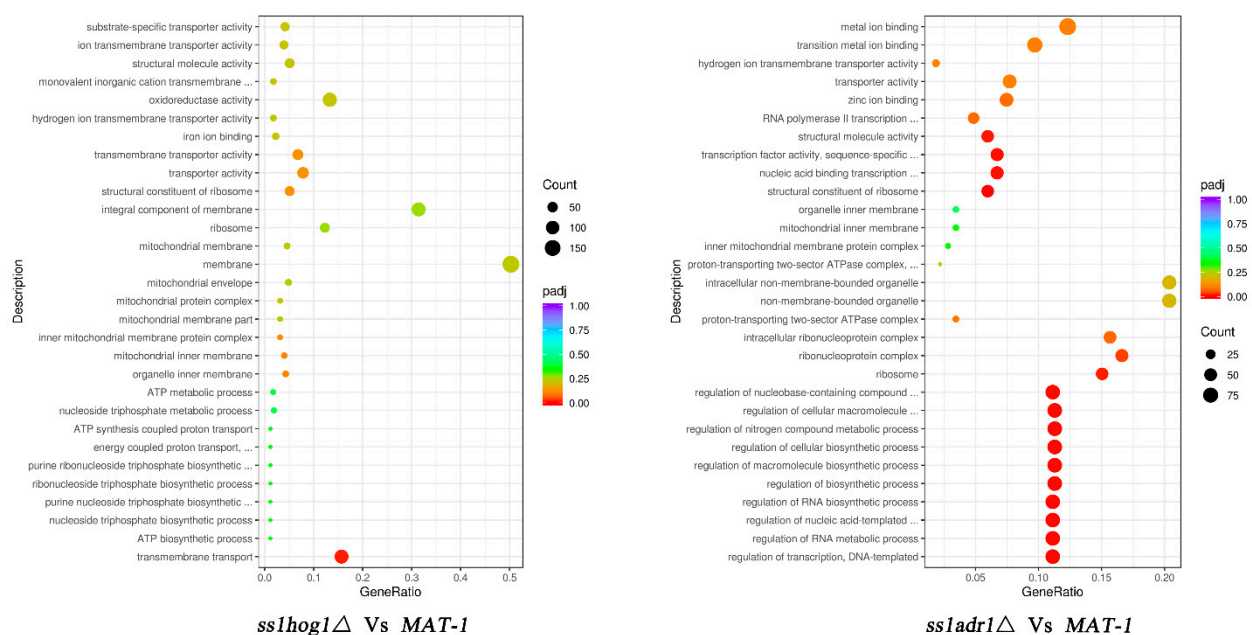

**Figure S2. GO enrichment analysis of differentially expressed genes (DEGs) in the *MAT-1*, *ss1hog1Δ*, and *ss1adr1Δ* strains.** Figure 6. GO enrichment analysis of differentially expressed genes (DEGs) in the *MAT-1*, *ss1hog1Δ*, and *ss1adr1Δ* strains. The haploid sporidia was allowed to grow on YePSA medium at 28 °C for 4 days, and then the total RNAs of *S. scitamineum* was extracted with TRIzol reagent. The bubble charts illustrate the terms in which the DEGs were enriched. The enrichment factor was calculated by (the number of different genes in a term/total number of different genes in a term) / (total number of genes in a term/total number of genes in a database). A *p*-value < 0.05 was considered statistically significant.

**Table S1.** The primers and sequences used in this study.

| The primers                    | Sequence (5' - 3')                          |
|--------------------------------|---------------------------------------------|
| The primers for gene deletion  |                                             |
| ZEO-LB-F                       | GATAGTTTAAACTGAAGGCGGG                      |
| ZEO-LB-R                       | GAAGTGCACGCAGTTGCCG                         |
| ZEO-RB-F                       | CAAGAACAAGCGCTGTCGCC                        |
| ZEO-RB-R                       | AGCGGGCAGTTCGGTTTCA                         |
| SsGPA3-LB-F                    | GAGGCAAGCCAAGCCAGTTGA                       |
| SsGPA3-LB-R                    | CCCGCCTTCAGTTTAAACTATCTTTGGGTGTGTGTGAGAGGCT |
| SsGPA3-RB-F                    | TGAAACCGAACTGCCCGCTTCGGCCAAGAAGCAGCGAT      |
| SsGPA3-RB-R                    | AGAAGCGATCAGCAAGCAAGCA                      |
| SsUAC1-LB-F                    | ATGCAATCTGCACTTCGGCC                        |
| SsUAC1-LB-R                    | CCCGCCTTCAGTTTAAACTATCCTTCTTTGGGTGCTCTCGTGC |
| SsUAC1-RB-F                    | TGAAACCGAACTGCCCGCTATGGTGGCCAGATCCTGGCTA    |
| SsUAC1-RB-R                    | AGGAAGCAGATCCACCAGTCG                       |
| SsADR1-LB-F                    | CTTGTTGAGAGGTGGGCGAT                        |
| SsADR1-LB-R                    | CCCGCCTTCAGTTTAAACTATCGAGTTGGCGTGATGAGACGG  |
| SsADR1-RB-F                    | TGAAACCGAACTGCCCGCTAGAGGAGGATTGCGAGCG       |
| SsADR1-RB-R                    | GATGAGCGTGATGCGTTTG                         |
| The primers for gene detection |                                             |
| SsGPA3-inside-F                | ATGGGAAACTGTCTTTCTTCCACAGAC                 |
| SsGPA3-inside-R                | TCACAGAATACCACTATCCTTGAGCG                  |
| SsUAC1-inside-F                | CCGGCACCTCAGCCATCCTT                        |
| SsUAC1-inside-R                | AGGTTGTCGTGCTTGCCGAG                        |
| SsADR1-inside-F                | CAACAACACCGCCGTCCAAG                        |
| SsADR1-inside-R                | CGTCACGGTCGGCAAATACG                        |

---

|                  |                       |
|------------------|-----------------------|
| SsGPA3-outside-F | GGCCGCCTCGATACTTCAGAG |
| SsGPA3-outside-R | TGCGGCGCACAGTAAGGTT   |
| SsUAC1-outside-F | GAGACGCGGTTAAGCGGGAA  |
| SsUAC1-outside-R | GGATCGGTCCAGGTTCTTCGG |
| SsADR1-outside-F | GCCGGAAAGGTAGATGCCCA  |
| SsADR1-outside-R | TCATCCTCTTCGCCATCCACG |

The primers for RT-qPCR

|                  |                        |
|------------------|------------------------|
| qRT-GAPDH-F      | CAGCTCGATGAAGGTCAAGAT  |
| qRT-GAPDH-R      | CACATCTGCTGGAAGGTAGAG  |
| qRT-SsGPA3-F     | CAAGTACATTCTCTGGCGTTTC |
| qRT-SsGPA3-R     | AGTCGGATGTTGCTCGTATC   |
| qRT-SsUAC1-F     | GCACGACAACCTGAGTGTA    |
| qRT-SsUAC1-R     | GCCGTCAAAGAGACCAAAGA   |
| qRT-SsADR1-F     | CGTGCTGCTCTACGAAATGC   |
| qRT-SsADR1-R     | AAGATCCTTGACGCCCCGTTT  |
| qRT-SsHOG1-F     | AGTGGACGTACTTGAGACCT   |
| qRT-SsHOG1-R     | ATCTCGCCTCTTGAGGACAT   |
| qRT-CDR99456.1-F | ACTCTGCGTTGGTCATCTTT   |
| qRT-CDR99456.1-R | ACCACCCAACCCTTGAATAC   |
| qRT-CDS01502.1-F | GTTCTTCCGTCATCGGTTCTC  |
| qRT-CDS01502.1-R | GAGCCCTTGTTGAGCTTCTT   |
| qRT-CDU25217.1-F | CCGCTGCTACTGGATATTTCA  |
| qRT-CDU25217.1-R | CTTGATGCTGAGAGGGTAAGTC |
| qRT-CDS00122.1-F | CAGACACACCACAATCGGTAT  |
| qRT-CDS00122.1-R | GATCATCGCCTGGGTAGAAAG  |
| qRT-CDR88142.1-F | ACAAGACCGACGCCTACTGC   |
| qRT-CDR88142.1-R | GATCTCACCCGAACGAGGCC   |
| qRT-CDU25158.1-F | GGCACCAACGGCTACTTTGC   |
| qRT-CDU25158.1-R | ACTGCCATGCCTCGCTTCTT   |
| qRT-CDU24651.1-F | AGCGCAGGCTCTTTGTATT    |
| qRT-CDU24651.1-R | TGGTTAAGCGTCCTGATGTG   |

---
